# Supplementary material
Source: PubMed Central journal article supplement (PMC6512455)
Supplement: jamaoncol-5-710-s002.pdf [file jamaoncol-5-710-s002.pdf]

## Supplementary Online Content

Lee K, Tripathy D, Demark-Wahnefried W, et al. Effect of aerobic and resistance exercise intervention on cardiovascular disease risk in women with early-stage breast cancer: a randomized clinical trial. *JAMA Oncol*. Published online March 28, 2019. doi:10.1001/jamaoncol.2019.0038

**eTable 1.** Female Specific Pre-set Cut Points of Six Variables in FRS and FRS-predicted 10-year Risk (%)

**eTable 2.** Patient Characteristics

This supplementary material has been provided by the authors to give readers additional information about their work.

**eTable 1.** Female Specific Pre-set Cut Points of Six Variables in FRS and FRS-predicted 10-year Risk (%)

| <b>Variable</b>                       |         | <b>Points</b> |
|---------------------------------------|---------|---------------|
| <b>Age (years)</b>                    | 30-34   | -9            |
|                                       | 35-39   | -4            |
|                                       | 40-44   | 0             |
|                                       | 45-49   | 3             |
|                                       | 50-54   | 6             |
|                                       | 55-59   | 7             |
|                                       | 60-74   | 8             |
| <b>LDL-Cholesterol</b>                | <100    | -2            |
|                                       | 100-159 | 0             |
|                                       | >160    | 2             |
| <b>HDL-Cholesterol</b>                | <35     | 5             |
|                                       | 35-44   | 2             |
|                                       | 45-49   | 1             |
|                                       | 50-59   | 0             |
|                                       | ≥60     | -2            |
| <b>Systolic blood pressure (mmHg)</b> | <120    | -3            |
|                                       | 120-139 | 0             |
|                                       | 140-159 | 2             |
|                                       | ≥160    | 3             |
| <b>Diagnosis of Diabetes</b>          | No      | 0             |
|                                       | Yes     | 4             |
| <b>Smoker *</b>                       | No      | 0             |
|                                       | Yes     | 2             |
| <b>FRS-predicted 10-year Risk (%)</b> | <-2     | 1             |
|                                       | -1 to 1 | 2             |
|                                       | 2 to 3  | 3             |
|                                       | 4       | 4             |
|                                       | 5       | 5             |
|                                       | 6       | 6             |
|                                       | 7       | 7             |
|                                       | 8       | 8             |
|                                       | 9       | 9             |
|                                       | 10      | 11            |
|                                       | 11      | 13            |
|                                       | 12      | 15            |
|                                       | 13      | 17            |
|                                       | 14      | 20            |
|                                       | 15      | 24            |
| 16                                    | 27      |               |
| ≥17                                   | ≥32     |               |

Adapted from Viera and Sheridan. Global Risk of Coronary Heart Disease: Assessment and Application. *Am Fam Physician*. 2010;82(3):265-274.

\* Smokers were screened out of this study due to the inclusion/exclusion criteria of the trial.

**eTable 2.** Patient Characteristics

Data reported as median (interquartile range) or number (%).

| Characteristic                          | Exercise<br>N = 50 | Usual Care<br>N = 50 | P value |
|-----------------------------------------|--------------------|----------------------|---------|
| Age (years)                             | 53 (38, 68)        | 52 (37, 66)          | 0.87    |
| Menopausal status, n (%)                |                    |                      |         |
| Premenopausal                           | 23 (44)            | 19 (38)              | 0.65    |
| Postmenopausal                          | 27 (56)            | 28 (62)              | 0.70    |
| Weight (kg)                             | 87 (75, 98)        | 85 (74, 95)          | 0.81    |
| Height (cm)                             | 162 (158, 166)     | 161 (156, 165)       | 0.87    |
| BMI (kg/m <sup>2</sup> )                | 33 (30, 36)        | 32 (30, 35)          | 0.90    |
| Race/Ethnicity, n (%)                   |                    |                      |         |
| Non-Hispanic White                      | 11 (21)            | 15 (31)              | 0.45    |
| Hispanic White                          | 28 (56)            | 27 (53)              | 0.95    |
| African American                        | 3 (6)              | 1 (2)                | 0.36    |
| Asian/Pacific Islander                  | 8 (17)             | 7 (14)               | 0.79    |
| Disease stage, n (%)                    |                    |                      |         |
| 1                                       | 20 (40)            | 21 (42)              | 0.91    |
| 2                                       | 19 (38)            | 19 (38)              | 1.00    |
| 3                                       | 11 (22)            | 10 (20)              | 0.95    |
| Treatment in addition to surgery, n (%) |                    |                      |         |
| Radiation only                          | 4 (8)              | 6 (12)               | 0.58    |
| Chemotherapy only                       | 8 (16)             | 5 (10)               | 0.69    |
| Radiation and chemotherapy              | 38 (76)            | 39 (78)              | 0.98    |
| Current endocrine therapy, n (%)        |                    |                      |         |
| None                                    | 6 (12)             | 10 (20)              | 0.39    |
| Tamoxifen                               | 23 (46)            | 24 (49)              | 0.77    |
| Aromatase inhibitor                     | 21 (42)            | 16 (31)              | 0.28    |

Group comparisons were performed by independent sample t tests for continuous variables and Pearson chi-squared and Fisher's exact tests for categorical variables.
